# Supplementary material for: A one-step and biocompatible cellulose functionalization for covalent antibody immobilization on immunoassay membranes
Source: Royal Society of Chemistry journal article supplement (doi:10.1039/c3tb20380h), 2013-01-01
Supplement: c3tb20380h.pdf [file c3tb20380h.pdf]

**Table 1** Operating conditions for cellulose modification. Diazonium salts section: previously synthesized compounds. Amines section: amine precursors for *in situ* synthesized diazonium salts.

| Reagent                                              | Mass for 0.3 mmol<br>(6 mL of 0.05 M solution) | Washing solvent                         | Chemical function<br>introduced onto paper |
|------------------------------------------------------|------------------------------------------------|-----------------------------------------|--------------------------------------------|
| <b>Diazonium salts</b>                               |                                                |                                         |                                            |
| 4-nitrobenzenediazonium tetrafluoroborate            | 71.1 mg                                        | Ethanol (96% (v/v) in H <sub>2</sub> O) | NO <sub>2</sub>                            |
| 4-mercaptobenzenediazonium tetrafluoroborate         | 67.2 mg                                        | Ethanol (96% (v/v) in H <sub>2</sub> O) | SH                                         |
| 4-carboxybenzenediazonium tetrafluoroborate          | 70.8 mg                                        | 0.1 M sodium hydroxide                  | COOH                                       |
| 4-(2-ammonioethyl)benzenediazonium tetrafluoroborate | 96.8 mg                                        | 0.1 M hydrochloric acid                 | (primary) NH <sub>2</sub>                  |
| 4-azidobenzenediazonium tetrafluoroborate            | 69.9 mg                                        | Ethanol (96% (v/v) in H <sub>2</sub> O) | N <sub>3</sub>                             |
| <b>Amines</b>                                        |                                                |                                         |                                            |
| 4-(2-aminoethyl)-aniline                             | 40.9 mg                                        | 0.1 M hydrochloric acid                 | (primary) NH <sub>2</sub>                  |
| 4-azidoaniline hydrochloride                         | 51.2 mg                                        | Ethanol (96% (v/v) in H <sub>2</sub> O) | N <sub>3</sub>                             |

**Table 2** Operating conditions for antibodies grafting.

| Paper                                                    | Bioconjugate Technique                                                                                                                                                             | Antibody grafted  |
|----------------------------------------------------------|------------------------------------------------------------------------------------------------------------------------------------------------------------------------------------|-------------------|
| <b>Unmodified paper</b>                                  |                                                                                                                                                                                    |                   |
| Nitrocellulose (AE98 Fast)                               | Deposit of the mAb (40 μL cm <sup>-2</sup> )<br>Overnight incubation at 4°C                                                                                                        | anti-OVA mAb      |
| Cellulose (CF1)                                          | Deposit of the mAb (40 μL cm <sup>-2</sup> )<br>Overnight incubation at 4°C                                                                                                        | anti-OVA mAb      |
| <b>Modified cellulose: chemical group borne by paper</b> |                                                                                                                                                                                    |                   |
| Nitro (NO <sub>2</sub> )                                 | Deposit of the mAb (40 μL cm <sup>-2</sup> )<br>Overnight incubation at 4°C                                                                                                        | anti-OVA mAb      |
| Thiol (SH)                                               | Deposit of the maleimido-mAb (40 μL cm <sup>-2</sup> )<br>Overnight incubation at 4°C                                                                                              | SMCC-anti-OVA mAb |
| Primary Amine (NH <sub>2</sub> )                         | Thiols introduction<br>Deposit of the maleimido-mAb (40 μL cm <sup>-2</sup> )<br>Overnight incubation at 4°C                                                                       | SMCC-anti-OVA mAb |
| Carboxyl (COOH)                                          | EDC/Sulfo-NHS activation of carboxyl groups<br>Deposit of the mAb (40 μL cm <sup>-2</sup> )<br>Overnight incubation at 4°C                                                         | anti-OVA mAb      |
| Azide (N <sub>3</sub> )                                  | Deposit of the mAb (40 μL cm <sup>-2</sup> )<br>Antibody concentration by drying at 40°C for 30 min in an air oven<br>Irradiation at 365 nm (1050 μW cm <sup>-2</sup> ) for 15 min | anti-OVA mAb      |

5

**Table 3** Characterization of the grafted chemical functions.

| Chemical function                | Most conclusive analysis                           | Characteristic signal                                                                                                                                          | Figure                      |
|----------------------------------|----------------------------------------------------|----------------------------------------------------------------------------------------------------------------------------------------------------------------|-----------------------------|
| Nitro (NO <sub>2</sub> )         | IR                                                 | NO <sub>2</sub> antisymmetric stretching vibration at 1525 ± 5 cm <sup>-1</sup><br>NO <sub>2</sub> symmetric stretching vibration at 1350 ± 5 cm <sup>-1</sup> | Figure 5 (a)                |
| Thiol (SH)                       | XPS                                                | S 2p orbital Binding Energy at 164 ± 0.35 eV<br>S 2s orbital Binding Energy at 220 ± 0.35 eV                                                                   | Figure 5 (b)                |
| Primary Amine (NH <sub>2</sub> ) | Ninhydrin staining<br>XPS                          | Brown color specific to primary amines<br>N 1s orbital Binding Energy at 400 ± 0.35 eV                                                                         | (not shown)<br>Figure 5 (c) |
| Azide (N <sub>3</sub> )          | Colloidal-gold-labeled antibody localized grafting | Color from the grafted biomolecule following the mask                                                                                                          | Figure 5 (d)                |
| Carboxyl (COOH)                  | IR & XPS & Dye                                     | Merging into cellulose signal                                                                                                                                  |                             |
